# Supplementary material for: A Mathematical Model of Blood Loss during Renal Resection
Source: MDPI journal article supplement (doi:10.3390/fluids8120316), 2023-12-10
Supplement: s1 [file s1]

## Supplementary Material

### S1 Effect of the fluid model assumption on a single-node asymmetric bifurcation

Expanding on section 2.3 of the main text, we conducted a sensitivity analysis on a simple asymmetric parent-daughter bifurcation with a single vascular node (Figure S1). For that, we used the Hagen-Poiseuille model with hematocrit, without and with backflow (sections S1.1, S1.2, respectively), a power law fluid model (section S1.3) and the Carreau model (section S1.4) which accounts for the non-Newtonian shear thinning behaviour of blood. In each case, we apply the conservation of flux, which is simply an extension of mass conservation, as well as the continuity of pressure at the bifurcation node, denoted in Figure S1 by  $P^*$  to solve a system of equations. The individual impedances and compliances calculated for each blood vessel are provided in Table S2 [1, 2].

#### S1.1 Hagen-Poiseuille model without backflow

Node-to-node pressure gradient calculation: For a steady laminar axisymmetric fully developed flow, the Navier-Stokes equations in cylindrical coordinates  $(r, \theta, x)$  can be reduced, with the assumption that  $u_r = u_\theta = 0$ , to an axial momentum equation with velocity  $u(x) = u_x$  as a function only of the spatial coordinate  $x$  for the length of the cylindrical blood vessel, which can be written as

$$\frac{1}{r} \frac{\partial}{\partial r} \left( r \frac{\partial u}{\partial r} \right) = \frac{1}{\mu} \left( \frac{dP}{dx} \right), \quad (s1)$$

where  $P$  denotes the pressure along the cylindrical vessel, dependent only on the axial coordinate  $x$ , and  $r$  represents the radial coordinate. The continuity equation and the angular equation of motion are identically satisfied. The viscosity of the blood,  $\mu$ , was assumed to be a function of the hematocrit, based on the Saito model [3]

$$\mu = \mu_0 \left[ 1 + \frac{2.5\phi}{(1 - \phi)} \right], \quad (s2)$$

where  $\mu_0$  denotes the viscosity of the solvent fluid and  $\phi$  represents the red blood cell population density. Typically, for humans,  $\phi$  is of the order of 40 – 45% [3]. The resulting velocity profile from equation (s1) is parabolic in nature. Using the definition for the flux,  $Q$  [4]

$$Q = \int_0^R 2\pi r u(r) dr, \quad (s3)$$

the pressure gradient  $\Delta P$  driving the flow is

$$\therefore \Delta P = \frac{8\mu L Q}{\pi R^4}. \quad (s4)$$

where  $R$  is the radius of the cylindrical blood vessel and  $L$  denotes its length.

Flux calculation: The conservation of flux for the parent-daughter bifurcation of Figure S1A without backflow can be written as

$$Q_{TOT} = Q_{L1} + Q_{R1}. \quad (s5)$$

Furthermore, the continuity of pressure at the bifurcation node can be expressed as

$$P^* = P_{L1} + \frac{8\mu L_{L1} Q_{L1}}{\pi R_{L1}^4} = P_{R1} + \frac{8\mu L_{R1} Q_{R1}}{\pi R_{R1}^4}, \quad (s6)$$

where  $L_{L1}$ ,  $L_{R1}$  and  $R_{L1}$ ,  $R_{R1}$  are the respective lengths and radii of the daughter vessels. The daughter fluxes  $Q_{L1}$  and  $Q_{R1}$  are unknown but can be determined algebraically in terms of a known input flux,  $Q_{TOT}$ . To determine  $Q_{L1}$  and  $Q_{R1}$  we need to rewrite equation (s6) in terms of the respective daughter vessel's total impedance via Ohm's law. This results in

$$Z_{L1} Q_{L1} + \frac{8\mu L_{L1} Q_{L1}}{\pi R_{L1}^4} = Z_{R1} Q_{R1} + \frac{8\mu L_{R1} Q_{R1}}{\pi R_{R1}^4}, \quad (s7)$$

where  $Z_{L1}$  and  $Z_{R1}$  represent the total impedance of the respective daughter blood vessels of Figure S1A and are given mathematically by equation (10) in the manuscript. Using equations (10), (s5) and (s7), we can algebraically determine the daughter fluxes  $Q_{L1}$  and  $Q_{R1}$  in terms of the parent flux  $Q_{TOT}$  for the given physical parameters shown in Table S1. The fluxes for the Hagen-Poiseuille model without backflow case were  $Q_{L1} = 300.275 \text{ ml/min}$  and  $Q_{R1} = 299.725 \text{ ml/min}$  as shown in Table S3.

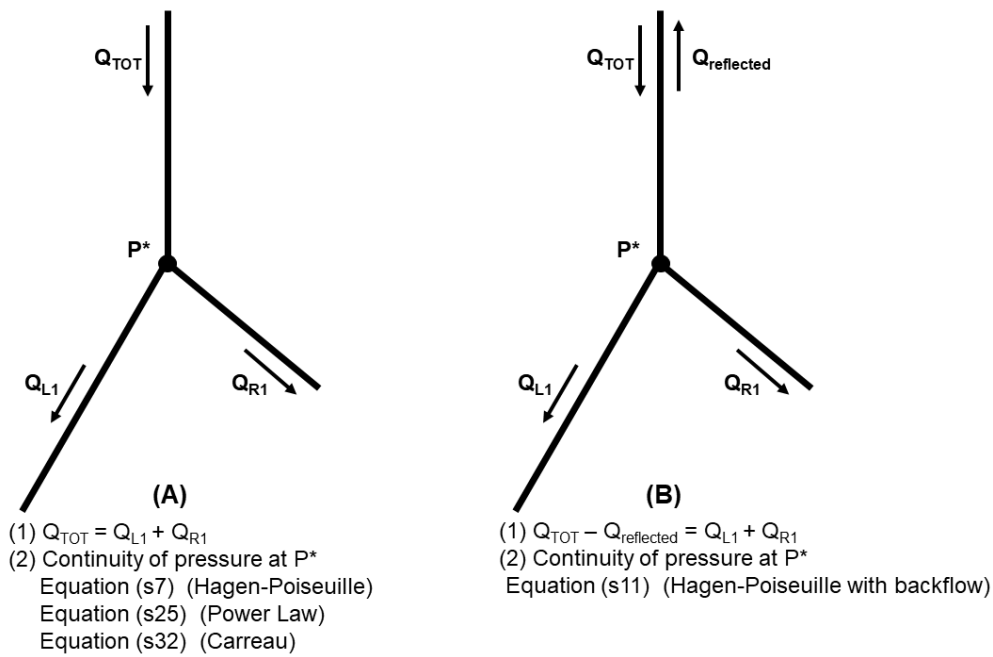

Figure S1. A single-node parent-daughter bifurcation (A) without backflow and (B) with backflow.  $P^*$  denotes the pressure at the bifurcation node.

Table S1. Physical parameters for the various fluid models examined in the single-node bifurcation of Figure S1.

| Physical parameter                              | Physical parameter notation | Value                                                             | Reference                            |
|-------------------------------------------------|-----------------------------|-------------------------------------------------------------------|--------------------------------------|
| Parent vessel radius                            | R                           | $2.7 \times 10^{-3} \text{m}$                                     | Cury et al. [5]                      |
| Left daughter vessel radius                     | $R_{L1}$                    | $2.5 \times 10^{-3} \text{m}$                                     |                                      |
| Right daughter vessel radius                    | $R_{R1}$                    | $2 \times 10^{-3} \text{m}$                                       |                                      |
| Parent vessel length                            | L                           | $4 \times 10^{-2} \text{m}$                                       |                                      |
| Left daughter vessel length                     | $L_{L1}$                    | $4 \times 10^{-2} \text{m}$                                       |                                      |
| Right daughter vessel length                    | $L_{R1}$                    | $2 \times 10^{-2} \text{m}$                                       |                                      |
| Viscosity term in Saito formula, equation (s2)  | $\mu_0$                     | $4 \times 10^{-3} \text{Pas}$                                     | Stark and Shuster [3]                |
| Hematocrit                                      | $\phi$                      | 0.40                                                              |                                      |
| Frequency                                       | f                           | 10 Hz                                                             | Abu-Naser et al. [1], Hsu et al. [2] |
| Left daughter vessel's total impedance          | $Z_{L1}$                    | $3.316 \times 10^9 \text{kgm}^{-4}\text{s}^{-1}$                  |                                      |
| Right daughter vessel's total impedance         | $Z_{R1}$                    | $3.316 \times 10^9 \text{kgm}^{-4}\text{s}^{-1}$                  |                                      |
| Parent vessel's total impedance                 | $Z_T$                       | $1.649 \times 10^9 \text{kgm}^{-4}\text{s}^{-1}$                  |                                      |
| Blood flux rate to a healthy human kidney       | $Q_{TOT}$                   | $600 \text{mlmin}^{-1}$<br>( $10^{-5} \text{m}^3 \text{s}^{-1}$ ) | Lok et al. [6]                       |
| Viscosity for the Power law model               | m                           | $16.24 \times 10^{-3} \text{Pas}$                                 | Bessonov et al. [7]                  |
| Index for the Power law model                   | n                           | 0.7163                                                            |                                      |
| Shear rate                                      | $\dot{\gamma}$              | $600 \text{s}^{-1}$                                               |                                      |
| Relaxation time                                 | $\lambda$                   | 3.313s                                                            |                                      |
| Carreau model – viscosity at zero shear rate    | $\mu_0$                     | 0.056Pas                                                          |                                      |
| Carreau model- viscosity at infinite shear rate | $\mu_\infty$                | 0.00345Pas                                                        |                                      |
| Index for the Carreau model                     | n                           | 0.3568                                                            |                                      |

Table S2. Individual impedances and compliances for the three element Windkessel model for the single-node bifurcation cases of Figure S1.

| Branch                   | $Z_1(\text{kgm}^{-4}\text{s}^{-1})$ | $Z_2(\text{kgm}^{-4}\text{s}^{-1})$ | $C(\text{kg}^{-1}\text{m}^4\text{s}^2)$ | $ Z (\text{kgm}^{-4}\text{s}^{-1})$ |
|--------------------------|-------------------------------------|-------------------------------------|-----------------------------------------|-------------------------------------|
| Parent vessel            | $1.180 \times 10^9$                 | $4.830 \times 10^8$                 | $1.840 \times 10^{-12}$                 | $1.649 \times 10^9$                 |
| Left daughter branch L1  | $6.136 \times 10^9$                 | $2.512 \times 10^9$                 | $9.568 \times 10^{-12}$                 | $3.316 \times 10^9$                 |
| Right daughter branch R1 | $6.136 \times 10^9$                 | $2.512 \times 10^9$                 | $9.568 \times 10^{-12}$                 | $3.316 \times 10^9$                 |

Table S3. Daughter fluxes for the sensitivity analysis for the various asymmetric single-node parent-daughter bifurcation models.

| Fluid model                       | Branch $Q_{L1}$ (ml/min) | Branch $Q_{R1}$ (ml/min) |
|-----------------------------------|--------------------------|--------------------------|
| Hagen-Poiseuille without backflow | 300.275                  | 299.725                  |
| Hagen-Poiseuille with backflow    | 296.245                  | 295.702                  |
| Power law without backflow        | 300.004                  | 299.996                  |
| Carreau without backflow          | 299.749                  | 300.251                  |

### S1.2 Hagen-Poiseuille model with backflow

Using Figure S1B, we apply the conservation of flux and the continuity of pressure at the bifurcation node which results in the following sets of equations,

$$Q_{TOT} - Q_{reflected} = Q_{L1} + Q_{R1}, \quad (s8)$$

and

$$\begin{aligned} P^* &= P_{TOT} - \frac{8\mu L Q_{TOT}}{\pi R^4} + P_{reflected} + \frac{8\mu L Q_{TOT}}{\pi R^4} \\ &= P_{L1} + \frac{8\mu L_{L1} Q_{L1}}{\pi R_{L1}^4} = P_{R1} + \frac{8\mu L_{R1} Q_{R1}}{\pi R_{R1}^4}, \end{aligned} \quad (s9)$$

where the pressures are related to the total impedance of each vessel via Ohm's law. Let

$$\alpha_{TOT} = \frac{8\mu L}{\pi R^4}, \quad \alpha_{L1} = \frac{8\mu L_{L1}}{\pi R_{L1}^4}, \quad \alpha_{R1} = \frac{8\mu L_{R1}}{\pi R_{R1}^4},$$

thus equation (s9) can be rewritten as

$$P^* = [Z_{TOT} - \alpha_{TOT}]Q_{TOT} + [Z_{TOT} + \alpha_{TOT}]Q_{reflected} = [Z_{L1} + \alpha_{L1}]Q_{L1} = [Z_{R1} + \alpha_{R1}]Q_{R1} \quad (s10).$$

Equation (s10) is rearranged resulting in

$$Q_{reflected} = Q_{TOT} \frac{[(Z_{R1} + \alpha_{R1})(Z_{L1} + \alpha_{L1}) - (Z_{TOT} - \alpha)(Z_{L1} + \alpha_{L1}) - (Z_{TOT} - \alpha)(Z_{R1} + \alpha_{R1})]}{[(Z_{R1} + \alpha_{R1})(Z_{L1} + \alpha_{L1}) + (Z_{TOT} + \alpha)(Z_{L1} + \alpha_{L1}) + (Z_{TOT} + \alpha)(Z_{R1} + \alpha_{R1})]} \quad (s11)$$

Using the appropriate physical data given in Table S1, we can determine the various fluxes for the Hagen-Poiseuille backflow model shown in Figure S1B. The fluxes for this case were  $Q_{L1} = 296.245\text{ml/min}$  and  $Q_{R1} = 295.702\text{ml/min}$  (see Table S3) which is approximately 1.4% lower in magnitude than the fluxes for the Hagen-Poiseuille without backflow.

### S1.3 The power law fluid model

Using the Navier-Stokes equation in cylindrical coordinates, we can show that the Cauchy stress,  $\sigma$ , leads to [7,8]

$$\begin{aligned} \frac{1}{r} \frac{\partial}{\partial r} (r\sigma) &= \frac{dP}{dx}, \\ \sigma &= \frac{r}{2} \left( \frac{dP}{dx} \right) + \frac{c_1}{r}, \end{aligned} \quad (s12)$$

where  $c_1$  denotes a constant of integration. Since we require a physical model  $c_1 \rightarrow 0$  as  $r \rightarrow 0$ . This results in

$$\sigma = \frac{r}{2} \left( \frac{dP}{dx} \right). \quad (s13)$$

The pressure gradient can be written as

$$\frac{dP}{dx} = \frac{\Delta P}{L}. \quad (s14)$$

Using equations (s13) and (s14), we get

$$\sigma = \frac{r\Delta P}{2L}. \quad (s15)$$

The viscosity of the fluid is given by

$$m \left( \frac{du}{dr} \right)^n, \quad (s16)$$

where  $du/dr = \dot{\gamma}$ , and  $\dot{\gamma}$  is defined as the shear strain rate [7,8]. Combining equations (s15) and (s16), we can show that

$$\frac{du}{dr} = \left( \frac{\Delta P}{2mL} \right)^{\frac{1}{n}} r^{\frac{1}{n}}. \quad (s17)$$

Integrating equation (s17) between the radial position  $r$ , to the vessel radius  $R$ , we can describe the velocity profile  $u$  as

$$u = \frac{1}{(1 + 1/n)} \left( \frac{\Delta P}{2mL} \right)^{\frac{1}{n}} (R^{1/(1+n)} - r^{1/(1+n)}). \quad (s18)$$

Calculating the flux,  $Q$ , where the flux is defined as (s3)

results in

$$Q = \frac{\pi}{(3 + 1/n)} \left( \frac{R}{2mL} \right) R^3 \Delta P^{\frac{1}{n}}. \quad (s19)$$

Defining the material parameter  $\alpha$  as

$$\alpha = \frac{\pi}{(3 + 1/n)} \left( \frac{R}{2mL} \right)^{\frac{1}{n}} R^3, \quad (s20)$$

allows us to write the pressure difference  $\Delta P$  as

$$\Delta P = \beta Q^n, \quad (s21)$$

where  $\beta = 1/\alpha^n$ . We can relate the pressure difference  $\Delta P$  to the pressure at the bifurcation node denoted by  $P^*$ , and the pressure within the individual blood vessel which is represented by  $P$ , via  $\Delta P = P^* - P$ . Using Ohm's law gives

$$P^* = \beta Q^n + ZQ. \quad (s22)$$

Considering the simple parent-daughter bifurcation described in Figure S1A and using equation (s22) along with the conservation of flux leads to the following system of equations

$$Q_{TOT} = Q_{L1} + Q_{R1}, \quad (s23)$$

$$P^* = Z_{L1}Q_{L1} + \beta_{L1}Q_{L1}^n = Z_{R1}Q_{R1} + \beta_{R1}Q_{R1}^n. \quad (s24)$$

Using equation (s24) and substituting in the conservation of flux for  $Q_{R1}$  from equation (s23) results in

$$\beta_{L1}Q_{L1}^n - \beta_{R1}(Q_{TOT} - Q_{L1})^n + (Z_{L1} + Z_{R1})Q_{L1} - Z_{R1}Q_{TOT} = 0. \quad (s25)$$

Equation (s25) reduces to a root finding problem which we can solve numerically using Mathematica© [9] and the appropriate material parameters given in Table S1. The fluxes for the fluid Power law were  $Q_{L1} = 300.004\text{ml/min}$  and  $Q_{R1} = 299.996\text{ml/min}$  (see Table S3) which is very close in magnitude to the fluxes associated with the Hagen-Poiseuille model without backflow.

#### S1.4 The Carreau fluid model for an asymmetric parent-daughter bifurcation

A key physical feature of blood is its shear thinning characteristics which we can model using the non-linear Carreau model [7,8]. The Carreau model has less physical limitations than the power law model,

with the power law model predicting an unbounded viscosity at zero shear rate and zero viscosity when  $\dot{\gamma} \rightarrow \infty$ , which is essentially unphysical in nature. The Carreau model is given by the equation  $\mu = \mu_\infty + (\mu_0 - \mu_\infty)(1 + \lambda^2 \dot{\gamma}^2)^{\frac{n-1}{2}}$ , (s26)

where  $\mu_0$  and  $\mu_\infty$  represent the viscosities at the respective physical boundaries and  $n$  is a non-dimensional number obtained empirically. The terms  $\lambda$  and  $\dot{\gamma}$  represent the relaxation term and the shear strain rate respectively. The shear strain rate for a typical unblocked artery is  $\dot{\gamma} = 600\text{s}^{-1}$ , the relaxation time is  $\lambda = 3.313\text{s}$ ,  $\mu_0 = 0.056\text{Pas}$ ,  $\mu_\infty = 0.00345\text{Pas}$  and  $n = 0.3568$  [7]. The viscosity  $\mu$  is related to the Cauchy stress  $\sigma$  via

$$\sigma = \mu \dot{\gamma}. \quad (\text{s27})$$

Using equations (s15), (s26) and (s27), and rearranging we get

$$\Delta P = \left(\frac{2L}{r}\right) \dot{\gamma} \left[ \mu_\infty + (\mu_0 - \mu_\infty)(1 + \lambda^2 \dot{\gamma}^2)^{\frac{n-1}{2}} \right], \quad (\text{s28})$$

where  $\Delta P = P^* - P$ . Using Ohm's law and rearranging equation (s28) leads to

$$P^* = ZQ + \left(\frac{2L}{r}\right) \dot{\gamma} \left[ \mu_\infty + (\mu_0 - \mu_\infty)(1 + \lambda^2 \dot{\gamma}^2)^{\frac{n-1}{2}} \right]. \quad (\text{s29})$$

Applying the conservation of flux and the continuity of pressure at the bifurcation point for Figure S1A, results in the following system of equations

$$Q_{\text{TOT}} = Q_{L1} + Q_{R1}, \quad (\text{s30})$$

$$\begin{aligned} P^* &= Z_{L1} Q_{L1} + \left(\frac{2L_{L1}}{R_{L1}}\right) \dot{\gamma} \left[ \mu_\infty + (\mu_0 - \mu_\infty)(1 + \lambda^2 \dot{\gamma}^2)^{\frac{n-1}{2}} \right] \\ &= Z_{R1} Q_{R1} + \left(\frac{2L_{R1}}{R_{R1}}\right) \dot{\gamma} \left[ \mu_\infty + (\mu_0 - \mu_\infty)(1 + \lambda^2 \dot{\gamma}^2)^{\frac{n-1}{2}} \right], \end{aligned} \quad (\text{s31})$$

Using equations (s30) and (s31) and rearranging, yields

$$Z_{L1} Q_{L1} - Z_{R1} (Q_{\text{TOT}} - Q_{L1}) + 2\dot{\gamma} \left( \frac{L_{L1}}{R_{L1}} - \frac{L_{R1}}{R_{R1}} \right) \left[ \mu_\infty + (\mu_0 - \mu_\infty)(1 + \lambda^2 \dot{\gamma}^2)^{\frac{n-1}{2}} \right] = 0. \quad (\text{s32})$$

We solved equation (s32) using Mathematica® [9] alongside the physical data given in Table S1. The fluxes for the Carreau model were  $Q_{L1} = 299.749\text{ml/min}$  and  $Q_{R1} = 300.251\text{ml/min}$  (see Table S3) which was very close in magnitude to the fluxes associated with the Hagen-Poiseuille model without backflow and the power law fluid model. However, the left branch L1 in the Carreau model had a slightly lower blood flux compared to the right branch, whereas both the Hagen-Poiseuille model without backflow and the power law fluid model exhibited slightly larger blood fluxes in the right branch compared to the left branch.

The data from this sensitivity analysis illustrate that the effects of backflow ( $Q_{\text{reflection}}$ ) were so small as to be negligible, being approximately 1.4% of the total flux  $Q_{\text{TOT}}$ . There was little difference between the flow rates for the Hagen-Poiseuille fluid model with a constant viscosity, the power law, and the Carreau model. It is worth noting that the Carreau model is dependent on the shear strain rate which influences the viscosity of blood, with higher shear strain rates resulting in a lower blood viscosity. We therefore primarily focused on the Carreau model without backflow when calculating the blood fluxes and blood losses that arise from the kidney vasculature of Figure 1A. Focusing on the Carreau

model rather than the Newtonian model offers more flexibility since it allows to account for shear thinning effects and varying shear rates.

## S2 Sensitivity analysis for the parameter space of a simple Y bifurcation

Tables discussed in the main text in Section 2.4

Table S4. Sensitivity analysis for the radius  $r_{L1}$  using the data from Tables S1 & S2.

| $r_{L1}$ (m)         | $Q_{L1}$ (ml/min) | $Q_{R1}$ (ml/min) |
|----------------------|-------------------|-------------------|
| $2.5 \times 10^{-3}$ | 299.749           | 300.251           |
| $2.0 \times 10^{-3}$ | 299.582           | 300.418           |
| $1.5 \times 10^{-3}$ | 299.304           | 300.696           |
| $1.0 \times 10^{-3}$ | 298.747           | 301.253           |

Table S5. Sensitivity analysis for the length  $L_{L1}$  using the data from Tables S1 & S2.

| $L_{L1}$ (m)       | $Q_{L1}$ (ml/min) | $Q_{R1}$ (ml/min) |
|--------------------|-------------------|-------------------|
| $4 \times 10^{-2}$ | 299.749           | 300.251           |
| $3 \times 10^{-2}$ | 299.917           | 300.083           |
| $2 \times 10^{-2}$ | 300.083           | 299.917           |
| $1 \times 10^{-2}$ | 300.251           | 299.749           |
| $5 \times 10^{-3}$ | 300.334           | 299.666           |

Table S6. Sensitivity analysis for the shear rate,  $\dot{\gamma}$ , using the data from Tables S1 & S2.

| $\dot{\gamma}$ (s <sup>-1</sup> ) | $Q_{L1}$ (ml/min) | $Q_{R1}$ (ml/min) |
|-----------------------------------|-------------------|-------------------|
| 100                               | 299.949           | 300.051           |
| 600                               | 299.749           | 300.25            |
| 1000                              | 299.594           | 300.406           |
| 2000                              | 299.211           | 300.789           |
| 5000                              | 298.072           | 301.928           |
| 10000                             | 296.184           | 303.816           |

Table S7. Sensitivity analysis for the hematocrit  $\phi$ , using the data from Tables S1 & S2.

| $\phi$ | $Q_{L1}$ (ml/min) | $Q_{R1}$ (ml/min) |
|--------|-------------------|-------------------|
| 0.35   | 300.242           | 299.758           |
| 0.40   | 300.275           | 299.725           |
| 0.45   | 300.314           | 299.686           |
| 0.50   | 300.36            | 299.64            |
| 0.55   | 300.416           | 299.584           |

Table S8 Sensitivity analysis for the impedance  $Z_{L1}$  using the data from Tables S1 & S2

| $Z_{L1}$ ( $\text{kgm}^{-4}\text{s}^{-1}$ ) | $Q_{L1}$ (ml/min) | $Q_{R1}$ (ml/min) |
|---------------------------------------------|-------------------|-------------------|
| $3.3 \times 10^9$                           | 300.473           | 299.527           |
| $3.4 \times 10^9$                           | 295.999           | 304.001           |
| $3.5 \times 10^9$                           | 291.656           | 308.344           |
| $3.6 \times 10^9$                           | 287.440           | 312.560           |
| $3.7 \times 10^9$                           | 283.342           | 316.658           |
| $3.8 \times 10^9$                           | 279.361           | 320.639           |
| $3.9 \times 10^9$                           | 275.489           | 324.511           |
| $4.0 \times 10^9$                           | 271.724           | 328.276           |

## References

1. Abu-Naser M, Williamson GA, Bidani AK, Griffin KA. Vascular resistance estimation in real hemodynamics using a time-varying Windkessel model. IEEE- ICASSP. 2005;5:641-4.
2. Hsu TL, Hsiu H, Chao PT, Li SP, Wang WK, Wang YYL. Three-block electrical model of renal impedance. IOP: Physiological measurement. 2005;26(4):387-99.
3. Stark H, Schuster S. Comparison of various approaches to calculating the hematocrit in vertebrates. Journal of applied physiology. 2012;113(3):355-67.
4. Grinberg L, Karniadakis GE. Outflow boundary conditions for arterial networks with multiple outlets. Annals of biomechanical engineering. 2008;36(9):1496-514.
5. Cury LFM, Talou GM, Younes-Ibrahim M, Blanco PJ. Parallel generation of extensive vascular networks with application to an archetypal human kidney model. Royal Society Open Science. 2021;8(12):1-22.
6. Lok CE, Huber TS, Lee T, Shenoy S, Yevzlin AS, Abreo K, et al. Kdoqi clinical practice guideline for vascular access: 2019 update. American journal of kidney diseases. 2020;75(4):1-164.
7. Bessonov N, Sequeira A, Simakov S, Vassilevskii Y, Volpert V. Methods of blood flow modelling. Mathematical Modelling of Natural Phenomena. 2016;11(1):1-25.
8. Sochi T. Analytical solutions for the flow of Carreau and Cross fluids in circular pipes and thin slits. Rheologica Acta. 2015;54:745-56.
9. Wolfram Research Inc. Mathematica. Version 130. 2022.
